# Supplementary material for: In Vivo Genetic Manipulation of Spermatogonial Stem Cells and Their Microenvironment by Adeno-Associated Viruses
Source: PubMed Central journal article supplement — Stem Cell Reports. 2018 Apr 5;10(5):1551–64. doi: 10.1016/j.stemcr.2018.03.005 (PMC5995272; doi:10.1016/j.stemcr.2018.03.005), 2018-04-05
Supplement: mmc1.pdf [file mmc1.pdf]

**Stem Cell Reports, Volume 10**

**Supplemental Information**

***In Vivo* Genetic Manipulation of Spermatogonial Stem Cells and Their  
Microenvironment by Adeno-Associated Viruses**

**Satoshi Watanabe, Mito Kanatsu-Shinohara, Narumi Ogonuki, Shogo Matoba, Atsuo Ogura, and Takashi Shinohara**

## Supplemental Figure S1

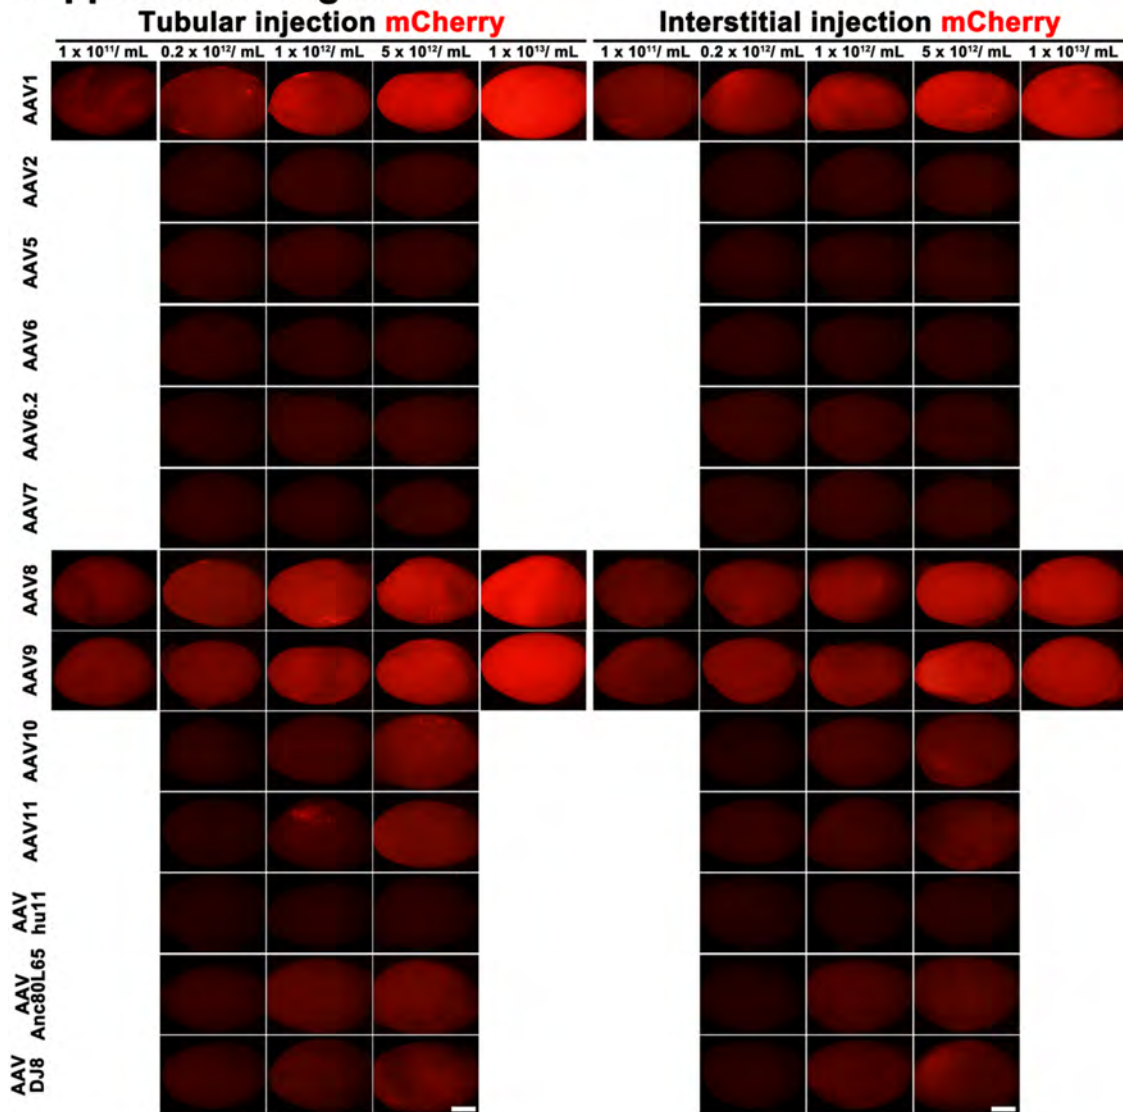

Supplementary Figure S1, related to Figure 1. Macroscopic appearance of wild-type testes 1 week after AAV infection. Bar, 1 mm.

Supplemental figure S2

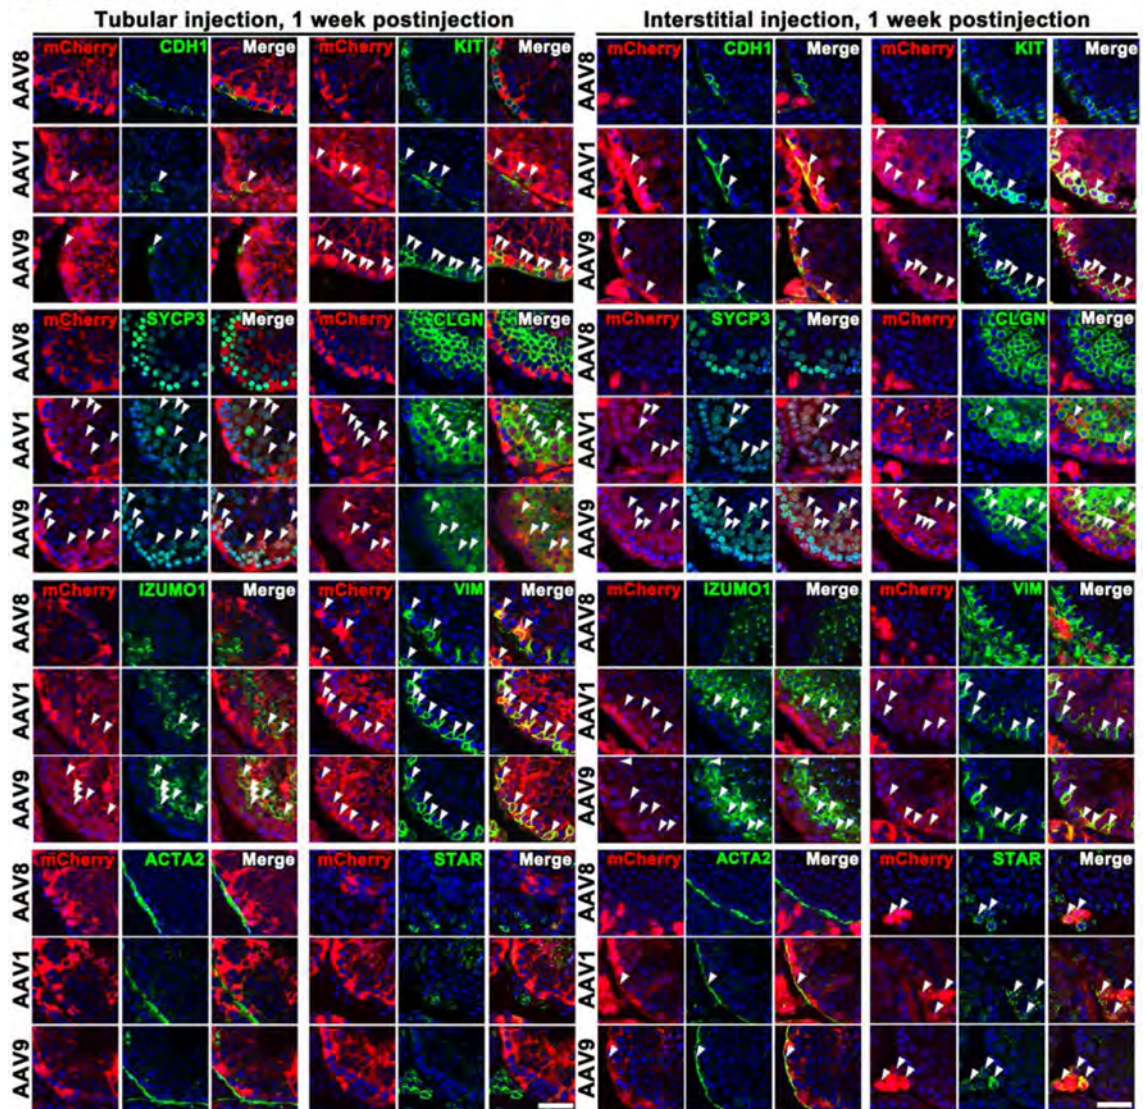

Supplementary Figure S2, related to Figure 1. Immunostaining of wild-type testes 1 week after AAV8, 1, and 9 infection. Bar, 40  $\mu$ m. Counterstain, Hoechst 33342.

**Supplemental figure S3**

**Tubular injection, 1 week postinjection**

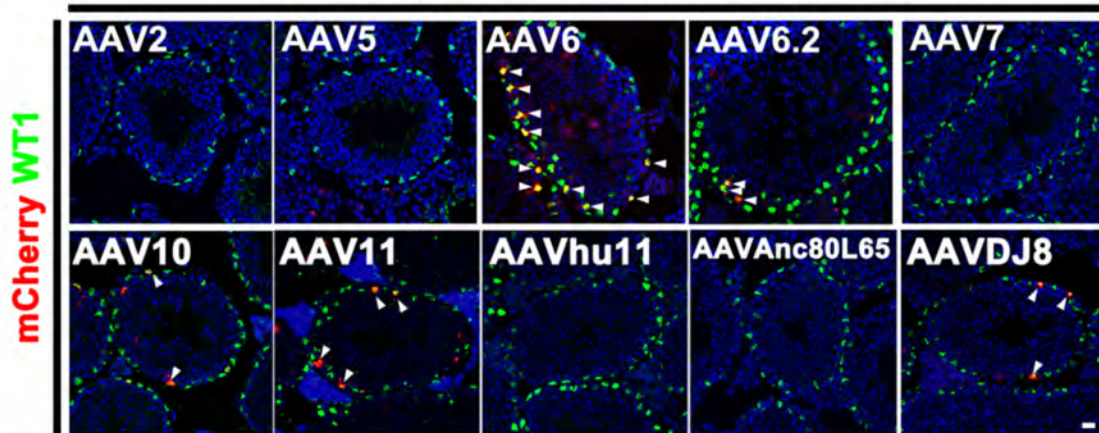

**Interstitial injection, 1 week postinjection**

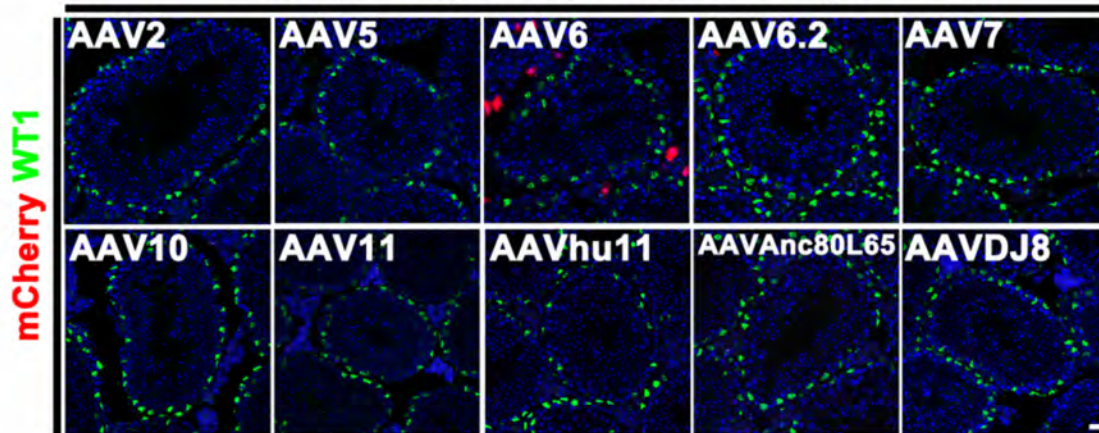

Supplementary Figure S3, related to Figure 1. Immunostaining of Sertoli cells in wild-type testes 1 week AAV2, 5, 6, 6.2, 7, 10, 11, hu11, Anc80L65, and DJ8 infection.

Bar, 40  $\mu$ m. Counterstain, Hoechst 33342.

Supplemental figure S4

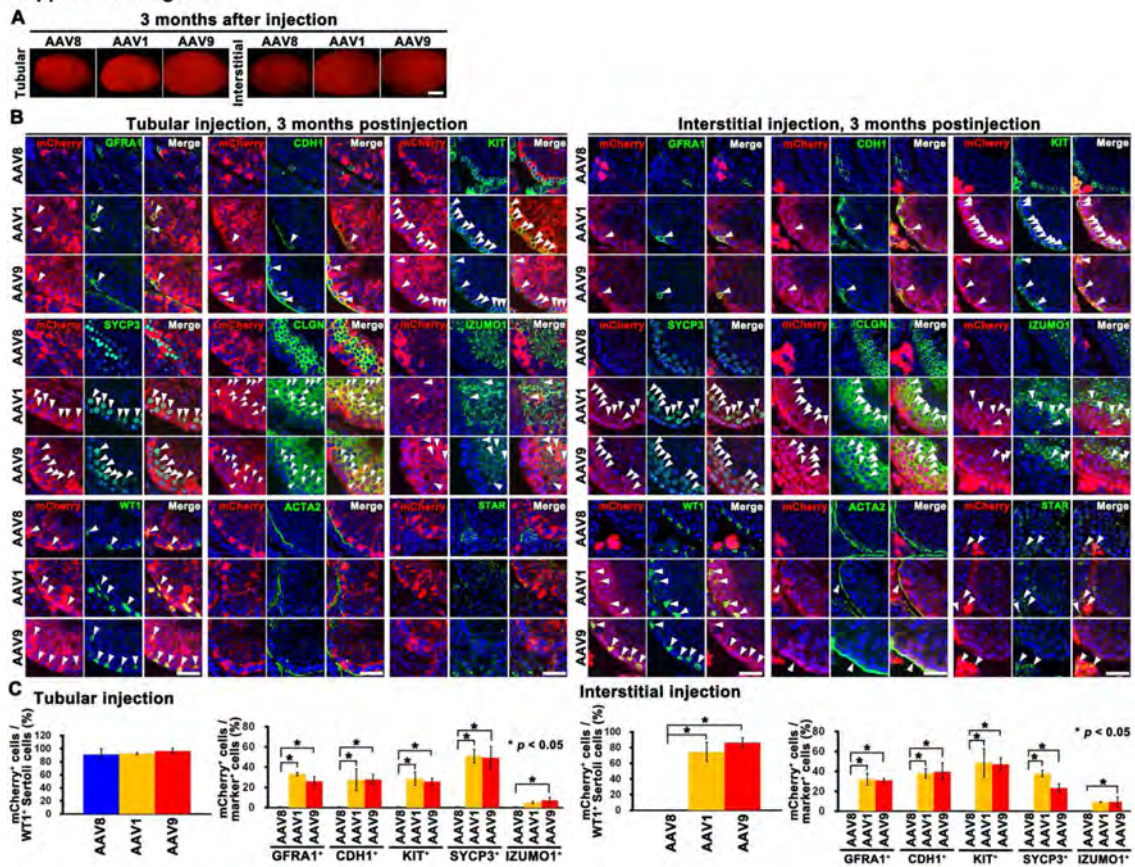

Supplementary Figure S4, related to Figure 1. Macroscopic appearance and immunostaining of wild-type testes 3 months after AAV8, 1, and 9 infection. (A) Macroscopic appearance ( $1 \times 10^{12}/\text{ml}$ ). (B) Immunostaining. (C) Quantification of immunostaining. Three tubules from 3 different testes were counted for each type. Bar, 1 mm (A), 40  $\mu\text{m}$  (B). Counterstain, Hoechst 33342 (B).

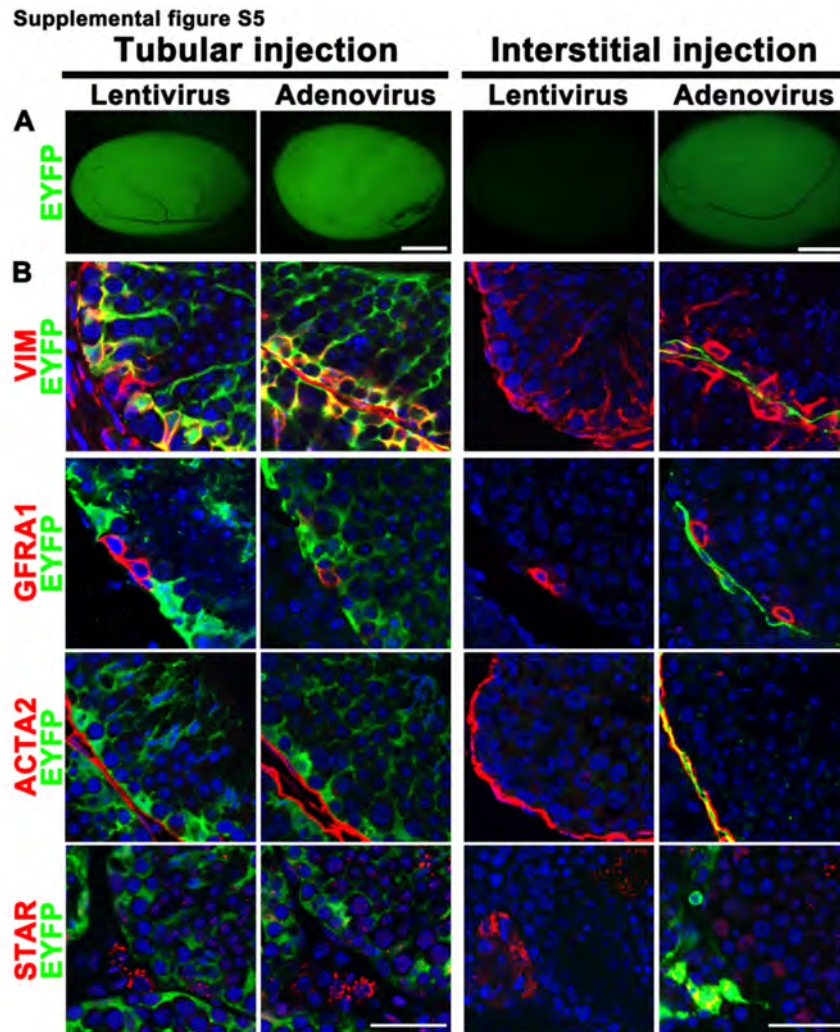

**Supplementary Figure S5**, related to Figure 1. Transduction of *R26R-Eyfp* testes by adeno- or lentiviral vectors. (A) Macroscopic appearance of *R26R-Eyfp* mouse testes 1 week after microinjection with AxCANCre and CSII-EF1-Cre. (B) Immunostaining. Bar, 1 mm (A), 40  $\mu$ m (B). Counterstain, Hoechst 33342 (B).

Supplemental figure S6

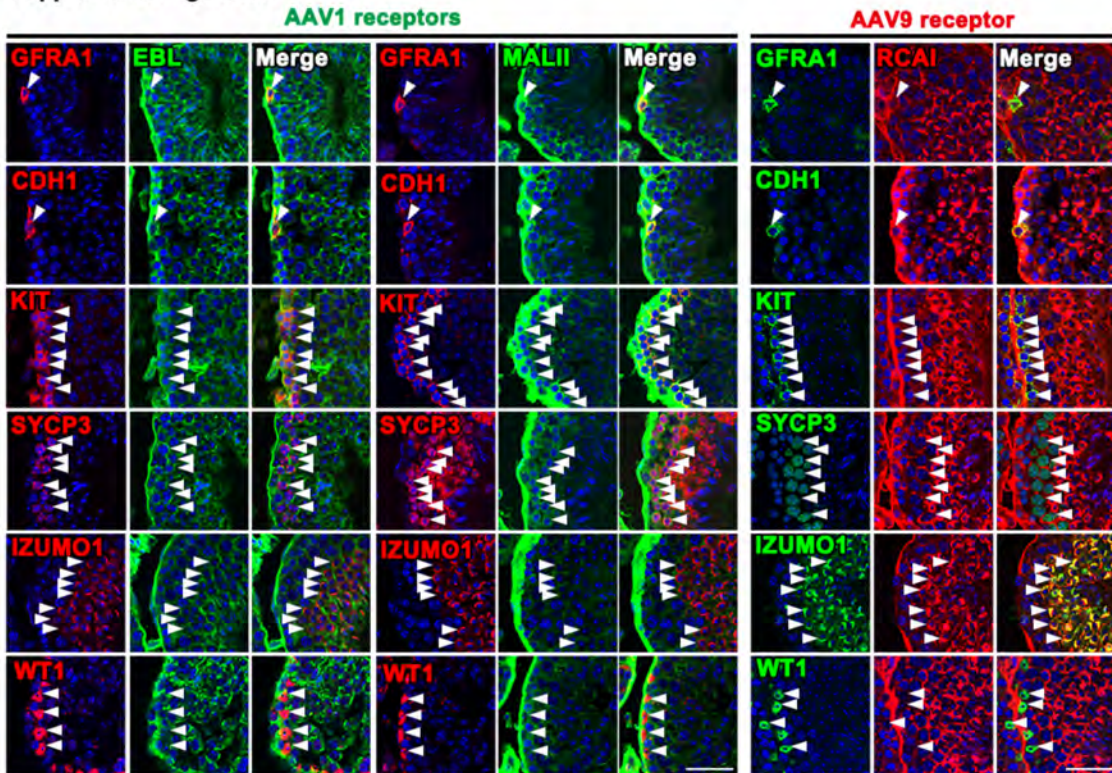

Supplementary Figure S6, related to Figure 1. Immunostaining and lectin staining.

Wild-type testes were stained with lectins that react with AAV1 (EBL, MALII) or AAV9 (RCA1) receptors along with immunostaining using germ cell makers. Bar, 40  $\mu$ m. Counterstain, Hoechst 33342.

**Supplemental figure S7**

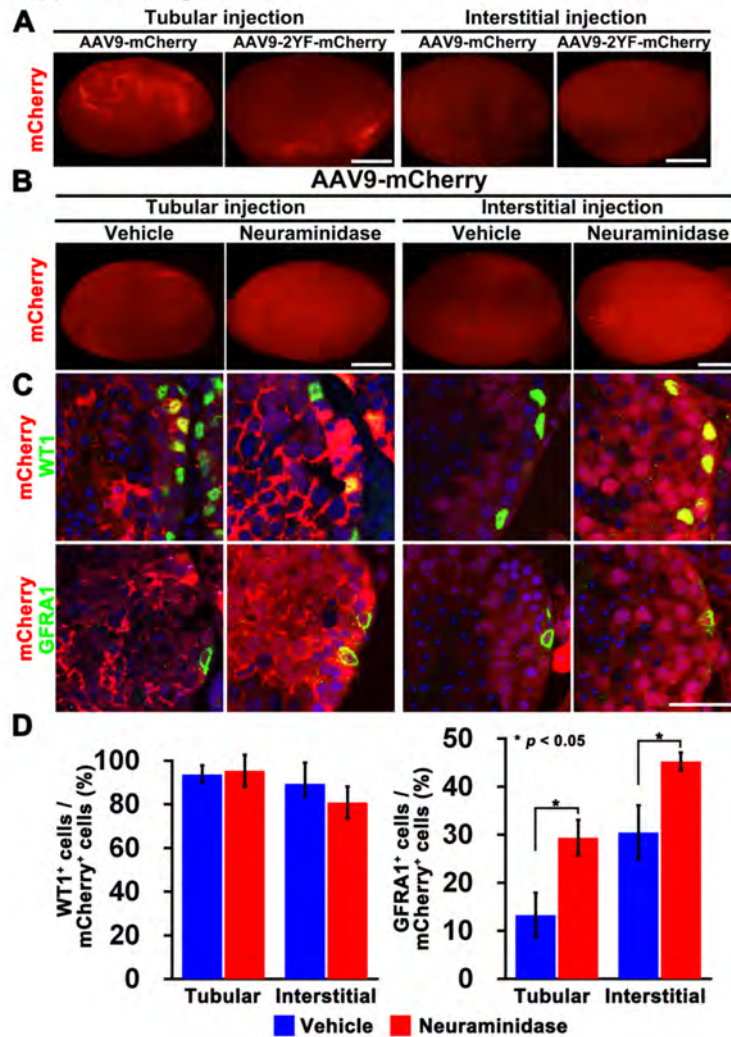

**Supplementary Figure S7**, related to Figure 4. Improvement of AAV9 transduction by neuraminidase treatment. (A) Macroscopic appearance of wild-type testes 1 week after microinjection with AAV9-2YF-mCherry. (B) Macroscopic appearance of wild-type testes 7 days after microinjection with AAV9-mCherry and neuraminidase. (C) Immunostaining. (D) Quantification of immunostaining. Three tubules from 3 different testes were counted for tubular and interstitial injection. Bar, 1 mm (A, B), 40  $\mu$ m (C). Counterstain, Hoechst 33342 (C).



Supplementary Table S1, Antibodies and lectins

| Name                                     | Catalog number | Origin                                              |
|------------------------------------------|----------------|-----------------------------------------------------|
| Rabbit anti-VIM                          | 5741S          | Cell Signaling, Danvers, MA                         |
| Mouse anti-ACTA2                         | A2547          | Sigma-Aldrich, St. Louis, MO                        |
| Rabbit anti-mouse WT1                    | sc-192         | Santa Cruz, Dallas, TX                              |
| Goat anti-rat GFRA1                      | AF560          | R & D systems, Minneapolis, MN                      |
| Rat anti-GFP                             | 04404-26       | Nacalai, Tokyo, Japan                               |
| Rabbit anti-GFP                          | MBL598         | MBL, Nagoya, Japan                                  |
| Rabbit anti-SYCP3                        | -              | Gift from Dr. S. Chuma (Kyoto University)           |
| Rat anti-KIT                             | 14-1171        | eBioscience, San Diego, CA                          |
| Rabbit anti-CLDN3                        | 34-1700        | Thermo Fisher Scientific, Waltham, MA               |
| Mouse anti-CLDN5                         | 35-2500        | Thermo Fisher Scientific, Waltham, MA               |
| Rabbit anti-CLDN11                       | Ab53041        | Thermo Fisher Scientific, Waltham, MA               |
| Rat anti-IZUMO1                          | KS64-125       | Gift from Dr. M. Okabe (Osaka University)           |
| Rat anti-CDH1 (ECCD2)                    | -              | Gift from Dr. M. Takeichi (RIKEN)                   |
| Rabbit anti-CLGN                         | Ab171971       | Abcam, Cambridge, UK                                |
| Rabbit anti-STAR                         | sc-25806       | Santa Cruz, Dallas, TX                              |
| Rat anti-EPCAM (CD326)                   | 118201         | Biologend, San Diego, CA                            |
| Rat anti-CD4                             | 12-0041        | eBioscience, San Diego, CA                          |
| Rat anti-CD8                             | Ab22378        | Abcam, Cambridge, UK                                |
| Alexa fluor 488 anti-rabbit IgG          | A21206         | Thermo Fisher Scientific, Waltham, MA               |
| Alexa fluor 488 anti-mouse IgG           | A21202         | Thermo Fisher Scientific, Waltham, MA               |
| Alexa fluor 488 anti-goat IgG            | A11055         | Thermo Fisher Scientific, Waltham, MA               |
| Alexa fluor 488 anti-rat IgG             | A21208         | Thermo Fisher Scientific, Waltham, MA               |
| Alexa fluor 555 anti-rabbit IgG          | A31572         | Thermo Fisher Scientific, Waltham, MA               |
| Alexa fluor 555 anti-mouse IgG           | A31570         | Thermo Fisher Scientific, Waltham, MA               |
| Alexa fluor 555 anti-goat IgG            | A21432         | Thermo Fisher Scientific, Waltham, MA, USA          |
| Alexa fluor 568 anti-rat IgG             | A11077         | Thermo Fisher Scientific, Waltham, MA               |
| Alexa fluor 647 anti-rat IgG             | 712-605-153    | Jackson ImmunoResearch Laboratories, West Grove, PA |
| Rhodamine-labeled peanut agglutinin      | RL-1072        | Vector Laboratories, Burlingame, CA                 |
| Biotinylated elderberry bark lectin      | B-1305         | Vector Laboratories, Burlingame, CA                 |
| Biotinylated maackia amurensis lectin II | B-1265         | Vector Laboratories, Burlingame, CA                 |
| Rhodamine ricinus communis agglutinin I  | RL-1082        | Vector Laboratories, Burlingame, CA                 |

Supplementary Table S2, Primer sequences

| Name                  | Forward                  | Reverse                  |
|-----------------------|--------------------------|--------------------------|
| <i>Fgf2</i>           | CATAGCAAGGTACCGGTTGG     | CTCTACTGCAAGAACGGCG      |
| <i>Gdnf</i>           | CTTCGAGAAGCCTCTTACCG     | GCCACTTGGAGTTAATGTCC     |
| <i>Kitl</i>           | TGGTGGCATCTGACACTAGT     | TGCCATGGCTGTCCATTGTA     |
| <i>Hprt</i>           | AAAGCGGTCTGAGGAGGAAC     | CGTTTCTGAGCCATTGCTGA     |
| <i>CAG-promoter</i>   | CCTGGCATTATGCCCAGTACATG  | GCTCACCTCGACCATGGTAATAG  |
| <i>Cre</i>            | GACGATGCAACGAGTGATGA     | AGCATTGCTGTCACTTGGTC     |
| <i>R26R-Eyfp</i>      | GGAGTGTTGCAATACCTTTCTGGG | AGCTCCTCGCCCTTGCTCACCCAT |
| <i>AAV-5'end</i>      | AGGGAGTGGCCAACTCCATCACTA | GGCGTTACTATGGGAACATACGTC |
| <i>AAV-Cre-3'end</i>  | CAATACCGGAGATCATGCAAGCTG | AGGGAGTGGCCAACTCCATCACTA |
| <i>AAV-Kitl-3'end</i> | GCCGGCTCTCATTTCGCTTGTAAT | AGGGAGTGGCCAACTCCATCACTA |
